# Supplementary material
Source: ML conference proceedings conference paper supplement (https://proceedings.neurips.cc/paper_files/paper/2022/hash/082e82cae0232f45f27fdd2612c31f8a-Abstract.html)
Supplement: Supplementary file 1 [file 082e82cae0232f45f27fdd2612c31f8a-Supplemental-Conference.zip]

Archive with 4 entries (4 files):
- Appendix.pdf
- __MACOSX/._Appendix.pdf
- code.zip
- __MACOSX/._code.zip
